# Supplementary material for: Construction of a unique 2D/0D NiO/ZnCdS p–n hetero junction photocatalyst with highly improved photocatalytic H2 generation capacity
Source: Royal Society of Chemistry journal article supplement (doi:10.1039/d3nj00856h), 2023-01-01
Supplement: d3nj00856h1.pdf [file d3nj00856h1.pdf]

# Supporting Information

## **Construction of unique 2D/0D NiO/ZnCdS p-n heterojunction photocatalyst with highly improved photocatalytic H<sub>2</sub> generation**

Gang He,<sup>a</sup> Yiming Liu,<sup>a</sup> Runchen Gao,<sup>a</sup> Yufeng Gan,<sup>a</sup> Wei Zhao,<sup>a</sup> Duoqiang Liang,<sup>a</sup>  
Toyohisa Fujita<sup>a</sup> and Deqian Zeng<sup>\*a</sup>

<sup>a</sup> State Key Laboratory of Featured Metal Materials and Life-cycle Safety for Composite Structures, School of Resources, Environment and Materials, Guangxi University, Nanning 530004, China

\*Corresponding author.

Email: Email: dqzeng@gxu.edu.cn (D. Zeng)

## **Characterization of the materials**

The X-ray diffraction (XRD) patterns were measured on a D/MAX 2500V diffractometer (Rigaku). UV-Visible (UV-Vis) absorption spectra were acquired using a Shimadzu 3600 UV-vis spectrophotometer. Scanning electron microscopy (SEM) images were obtained using a Zeiss Sigma 300. Transmission electron microscopy (TEM) images were carried out on a TECNAI F-30 at an accelerating voltage of 300 kV. XPS measurements were performed with an ESCALAB 250Xi. Under 370 nm excitation, photoluminescence (PL) and time-resolved photoluminescence (TRPL) were collected on the OmniFluo990LSP fluorescence spectrophotometer and HORIBA FL3C-111 fluorescence lifetime spectrophotometer, respectively. The photocurrent responses, electrochemical impedance spectroscopy (EIS), and Mott-Schottky plots were performed using a Bio-Logic VSP-300 multichannel potentiostat with a three-electrode system. The platinum sheet, Ag/AgCl electrode, and Na<sub>2</sub>SO<sub>4</sub> solution (0.1 M) serve as the counter electrode, reference electrode, and electrolyte, respectively. A working electrode was prepared by coating ITO glass (1.0 cm x 2.0 cm) with a catalyst slurry (5 mg of photocatalysts dispersed in 0.5 mL of ethanol and 10 μL of Nafion solution) and then dried in a vacuum drying oven.

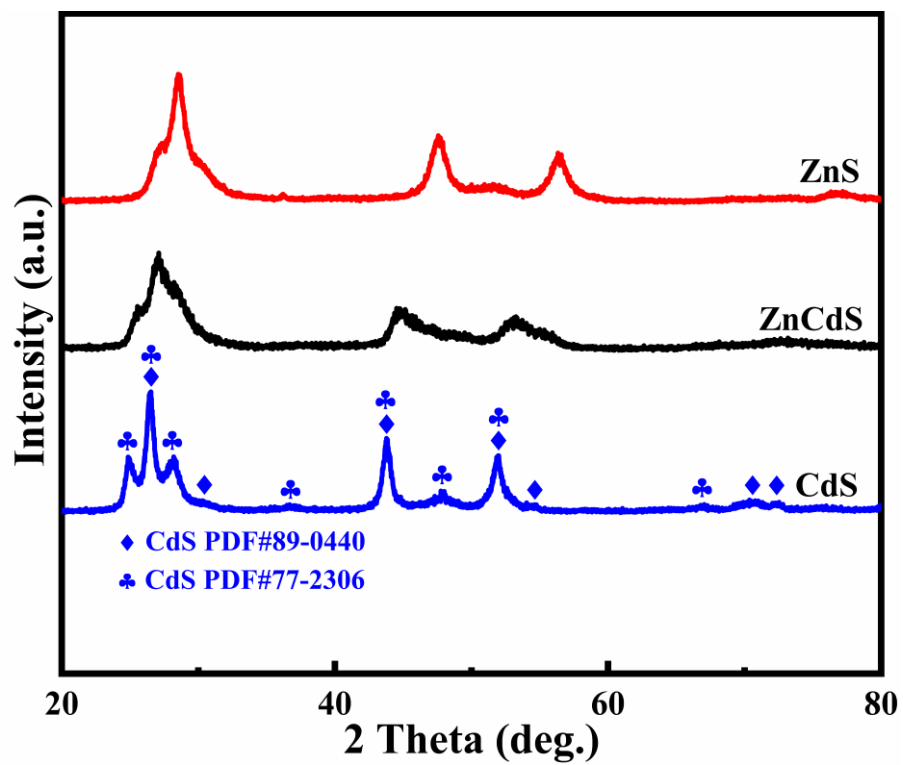

Fig. S1 XRD patterns of ZnS, CdS, and ZnCdS samples.

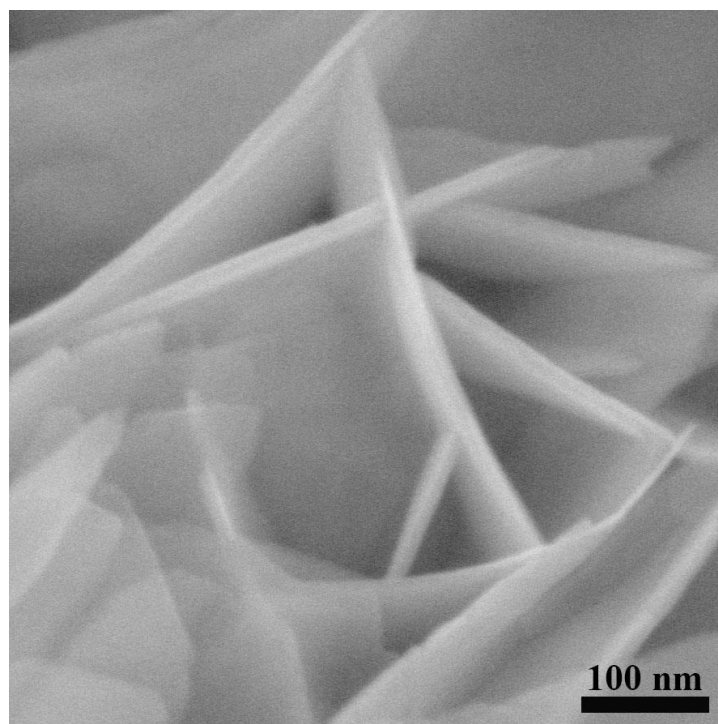

Fig. S2 SEM image of Ni(OH)<sub>2</sub> nanosheets.

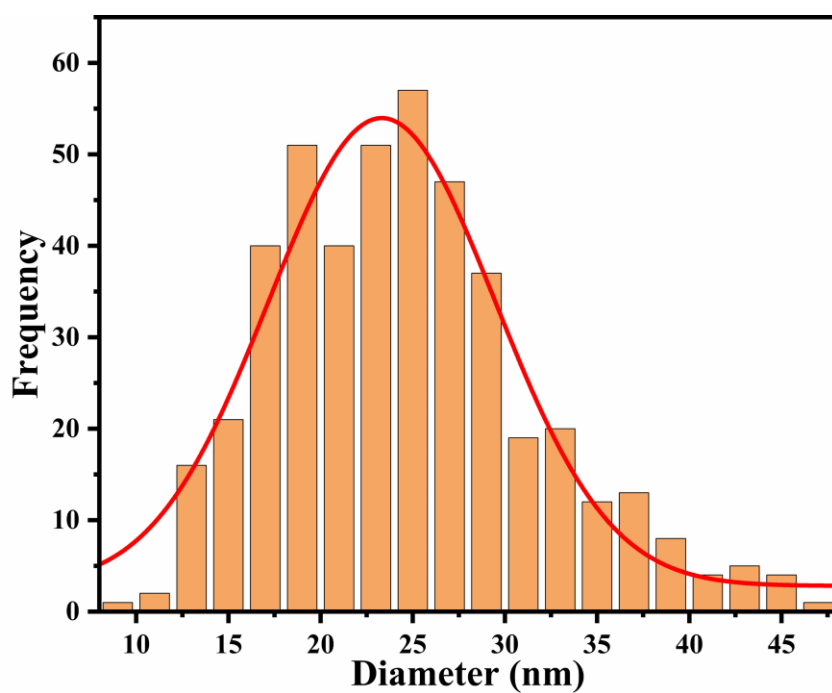

Fig. S3 Particle size distribution histogram of ZnCdS nanoparticles.

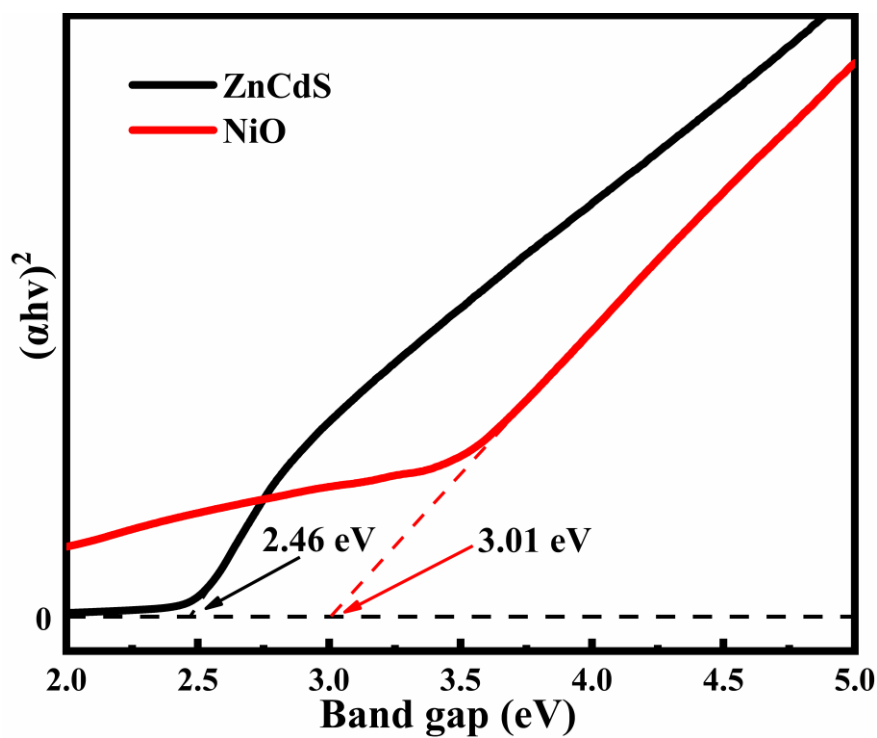

Fig. S4 Tauc plots of NiO nanosheets and ZnCdS nanoparticle.

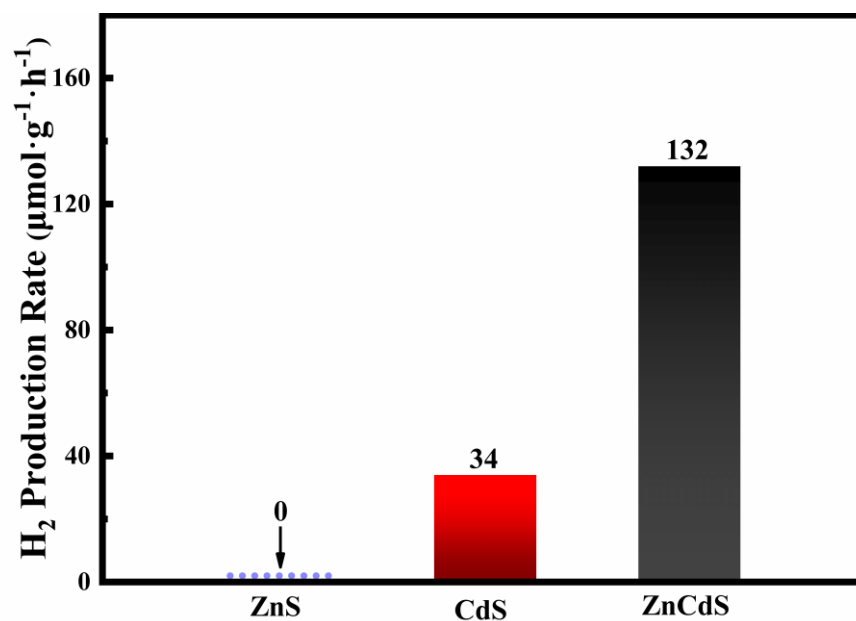

**Fig. S5** Average H<sub>2</sub> production rates of ZnS, CdS, and ZnCdS samples under visible-light irradiation ( $\lambda > 420$  nm).

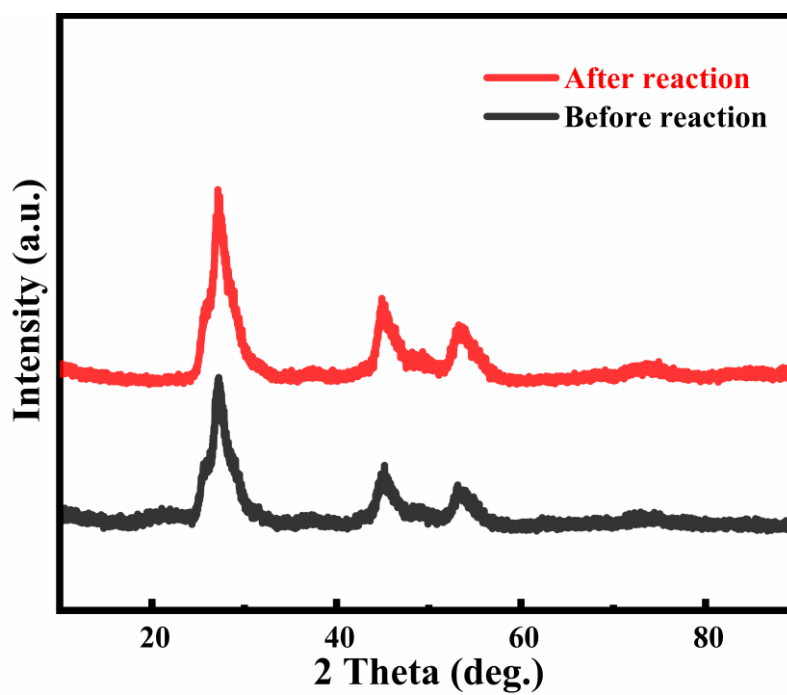

**Fig. S6** XRD patterns of the 5% NiO/ZnCdS sample before and after cycling photocatalytic reactions.

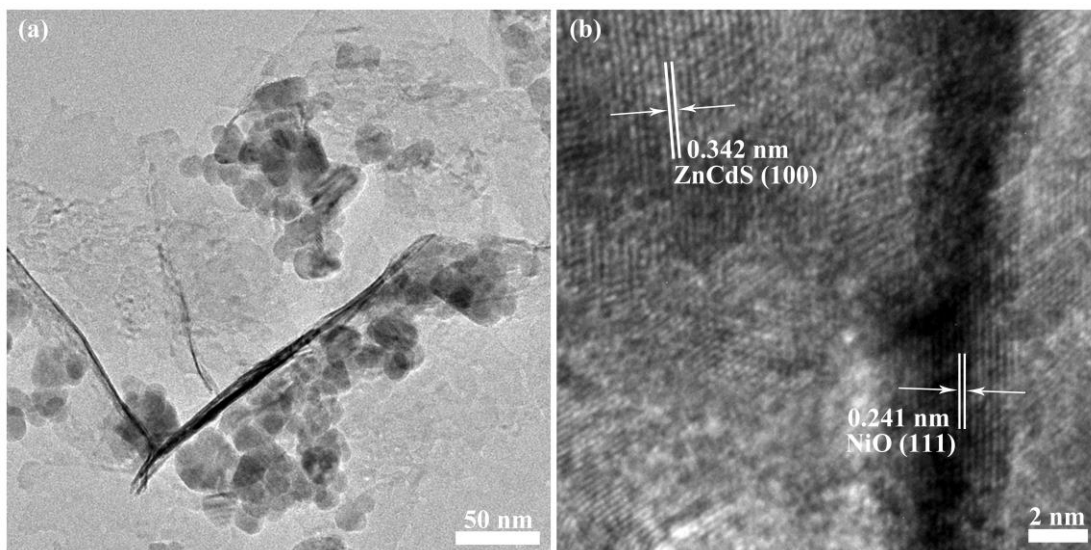

**Fig. S7** TEM images of the 5% NiO/ZnCdS sample after cycling photocatalytic reactions.

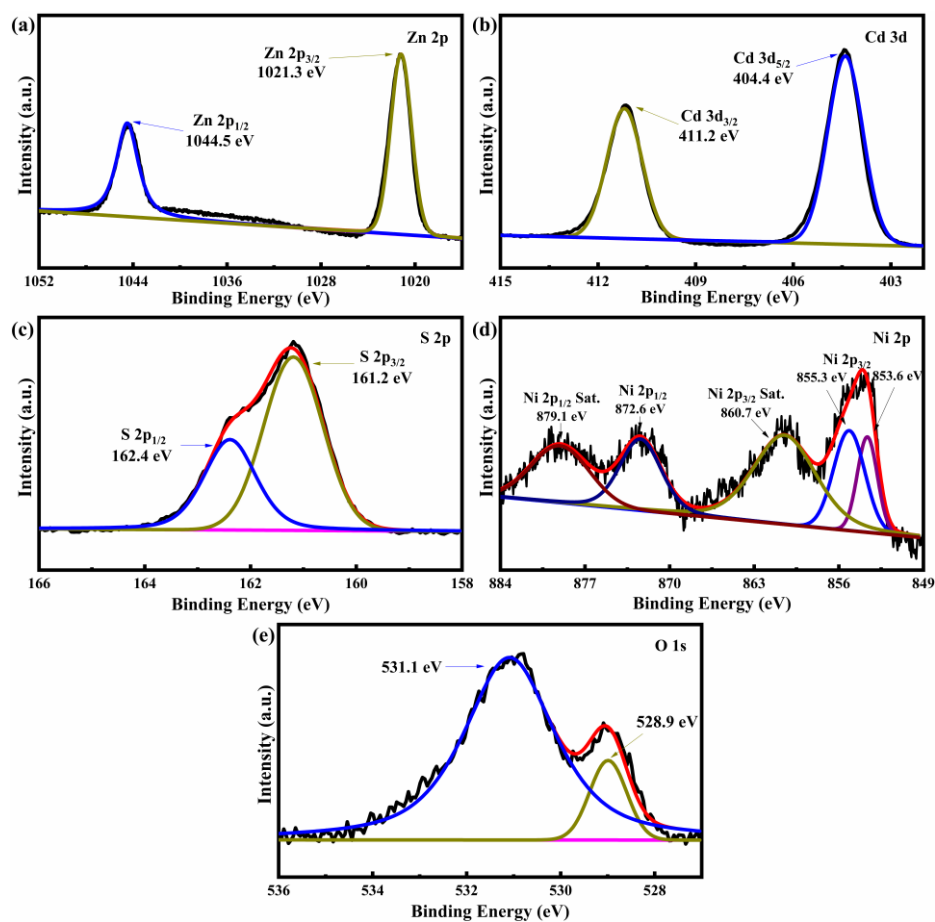

**Fig. S8** XPS spectra of the 5% NiO/ZnCdS sample after cycling photocatalytic reactions.

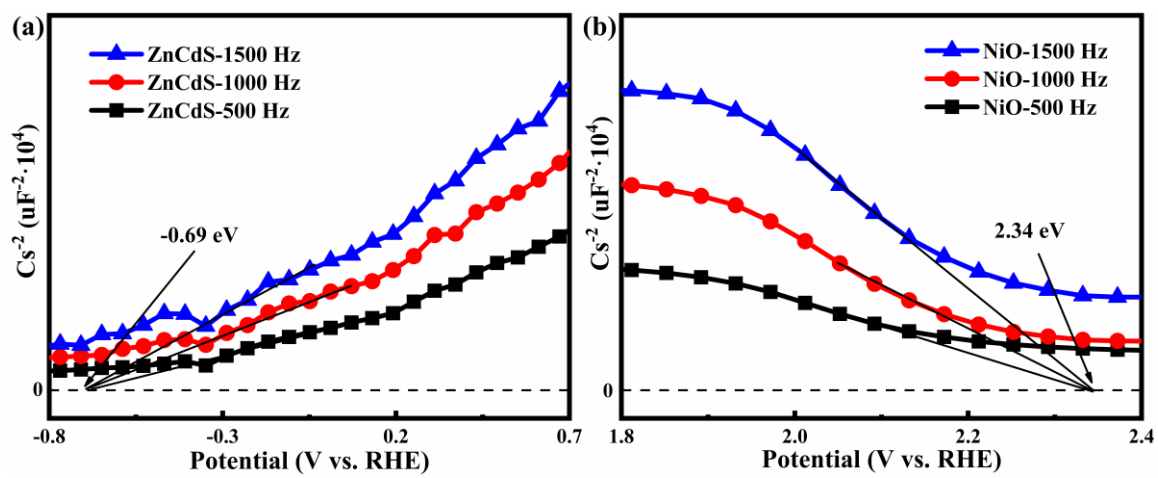

**Fig. S9** Mott-Schottky plots of (a) ZnCdS nanoparticles and (b) NiO nanosheets.

**Table S1.** Photocatalytic H<sub>2</sub> evolution activity of ZnCdS-based photocatalysts.

|    | <b>Photocatalyst</b>                                                                        | <b>Light source</b>                                             | <b>Scavenger</b>                                         | <b>Activity<br/>(<math>\mu\text{mol h}^{-1} \text{g}^{-1}</math>)</b> | <b>Enhancement factor*<br/>(Reference)</b>   | <b>Refs</b>          |
|----|---------------------------------------------------------------------------------------------|-----------------------------------------------------------------|----------------------------------------------------------|-----------------------------------------------------------------------|----------------------------------------------|----------------------|
| 1  | MoS <sub>2</sub> /Zn <sub>0.5</sub> Cd <sub>0.5</sub> S<br>/g-C <sub>3</sub> N <sub>4</sub> | 300 W Xe<br>lamp                                                | Na <sub>2</sub> S<br>/Na <sub>2</sub> SO <sub>3</sub>    | 4914                                                                  | /                                            | 1                    |
| 2  | Zn <sub>0.5</sub> Cd <sub>0.5</sub> S<br>@MoS <sub>2</sub> /RGO                             | 300 W Xe<br>lamp                                                | Lactic acid                                              | 2310                                                                  | 9 (Zn <sub>0.5</sub> Cd <sub>0.5</sub> S)    | 2                    |
| 3  | Zn <sub>0.5</sub> Cd <sub>0.5</sub> S<br>@PAN                                               | 350 W Xe<br>lamp                                                | Na <sub>2</sub> S<br>/Na <sub>2</sub> SO <sub>3</sub>    | 475                                                                   | 27.4 (Zn <sub>0.5</sub> Cd <sub>0.5</sub> S) | 3                    |
| 4  | Zn <sub>0.5</sub> Cd <sub>0.5</sub> S<br>@Ni-Glycerate                                      | CEL-LED<br>100                                                  | Na <sub>2</sub> S<br>/Na <sub>2</sub> SO <sub>3</sub>    | 2800                                                                  | /                                            | 4                    |
| 5  | Zn <sub>0.7</sub> Cd <sub>0.3</sub> S<br>/PDI                                               | /                                                               | Na <sub>2</sub> S<br>/Na <sub>2</sub> SO <sub>3</sub>    | 5166                                                                  | 6.5 (Zn <sub>0.7</sub> Cd <sub>0.3</sub> S)  | 5                    |
| 6  | CdS<br>@Cd <sub>x</sub> Zn <sub>1-x</sub> S                                                 | 300 W Xe<br>lamp<br>( $\lambda \geq 420 \text{ nm}$ )           | Na <sub>2</sub> S<br>/Na <sub>2</sub> SO <sub>3</sub>    | 5170                                                                  | 12.3 (Cd <sub>x</sub> Zn <sub>1-x</sub> S)   | 6                    |
| 7  | Zn <sub>0.7</sub> Cd <sub>0.3</sub> S<br>/NiWO <sub>4</sub>                                 | 5 W LED<br>( $\lambda \geq 420 \text{ nm}$ )                    | Na <sub>2</sub> S<br>/Na <sub>2</sub> SO <sub>3</sub>    | 15,950                                                                | 3.16 (Zn <sub>0.7</sub> Cd <sub>0.3</sub> S) | 7                    |
| 8  | Zn <sub>0.5</sub> Cd <sub>0.5</sub> S<br>/C                                                 | 300 W Xe<br>lamp<br>( $\lambda \geq 420 \text{ nm}$ )           | Na <sub>2</sub> S<br>/Na <sub>2</sub> SO <sub>3</sub>    | 2018                                                                  | /                                            | 8                    |
| 9  | Ni <sub>2</sub> P<br>/ZnCdS                                                                 | 300 W Xe<br>lamp<br>( $\lambda \geq 420 \text{ nm}$ )           | Na <sub>2</sub> S<br>/Na <sub>2</sub> SO <sub>3</sub>    | 1040                                                                  | 5 (ZnCdS)                                    | 9                    |
| 10 | <b>NiO<br/>/ZnCdS</b>                                                                       | <b>300 W Xe<br/>lamp (<math>\lambda &gt;</math><br/>420 nm)</b> | <b>Na<sub>2</sub>S<br/>/Na<sub>2</sub>SO<sub>3</sub></b> | <b>5042</b>                                                           | <b>38.2 (ZnCdS)</b>                          | <b>This<br/>work</b> |



**Table S2.** Fitting results of the Nyquist plots for ZnCdS, 5% NiO/ZnCdS, and NiO photocatalysts.

| Photocatalyst | $R_s$ ( $\Omega$ ) | $R_{ct}$ ( $k\Omega$ ) | CPE<br>( $F \cdot cm^{-2} \cdot S^{n-1}$ ) | n    |
|---------------|--------------------|------------------------|--------------------------------------------|------|
| ZnCdS         | 9.859              | 612                    | 1.02E-4                                    | 0.89 |
| 5% NiO/ZnCdS  | 9.832              | 67.1                   | 2.37E-4                                    | 0.84 |
| NiO           | 9.804              | 8.03                   | 2.73E-4                                    | 0.62 |

**Table S3.** Decay parameters of pure ZnCdS and 5% NiO/ZnCdS.

| Samples      | Lifetime, T (ns) | Rel (%)      | $T_{av}$ (ns) |
|--------------|------------------|--------------|---------------|
| ZnCdS        | $T_1= 2.04$      | $B_1= 64.82$ | 3.06          |
|              | $T_2= 41.24$     | $B_2= 35.18$ |               |
| 5% NiO/ZnCdS | $T_1= 2.79$      | $B_1= 45.69$ | 5.92          |
|              | $T_2= 110.21$    | $B_2= 54.31$ |               |

## References

1. Y. Tang, X. Li, D. Zhang, X. Pu, B. Ge and Y. Huang, *Mater. Res. Bull.*, 2019, **110**, 214-222.
2. S. N. Guo, Y. L. Min, J. C. Fan and Q. J. Xu, *ACS Appl. Mater. Interfaces*, 2016, **8**, 2928-2934.
3. J. Fu, B. Zhu, W. You, M. Jaroniec and J. Yu, *Appl. Catal. B*, 2018, **220**, 148-160.
4. J. Huang, X. Ma, Y. Sun, L. Wang, H. She, J. Li and Q. Wang, *Mater. Sci. Semicond. Process.*, 2020, **105**, 104703.

5. J. Song, Y. Chen, D. Sun and X. Li, *Inorg. Chem. Commun.*, 2018, **92**, 27-34.
6. S. Kai, B. Xi, Y. Wang and S. Xiong, *Chem. Eur. J.*, 2017, **23**, 16653-16659.
7. Y. Liu, G. Wang, Y. Li and Z. Jin, *J. Colloid Interface Sci.*, 2019, **554**, 113-124.
8. X. Zhou, X. Wang, X. Feng, K. Zhang, X. Peng, H. Wang, C. Liu, Y. Han, H. Wang and Q. Li, *ACS Appl. Mater. Interfaces*, 2017, **9**, 22560-22567.
9. S. Peng, Y. Yang, J. Tan, C. Gan and Y. Li, *Appl. Surf. Sci.*, 2018, **447**, 822-828.
